# Supplementary material for: Extensive shift in placental transcriptome profile in preeclampsia and placental origin of adverse pregnancy outcomes
Source: PubMed Central journal article supplement (PMC4542630; doi:10.1038/srep13336), 2015-08-13
Supplement: srep13336-s1.pdf [file srep13336-s1.pdf]

## Supplementary Information

### Extensive shift in placental transcriptome profile in preeclampsia and placental origin of adverse pregnancy outcomes

Siim Sõber<sup>1\*</sup>, Mario Reiman<sup>1</sup>, Triin Kikas<sup>1</sup>, Kristiina Rull<sup>1,2,3</sup>, Rain Inno<sup>1</sup>, Pille Vaas<sup>2,3</sup>, Pille Teesalu<sup>2,3</sup>, Jesus M. Lopez Marti<sup>4</sup>, Pirkko Mattila<sup>4</sup>, Maris Laan<sup>1\*</sup>

<sup>1</sup>Human Molecular Genetics Research Group, Institute of Molecular and Cell Biology, University of Tartu, Tartu 51010, Estonia

<sup>2</sup>Department of Obstetrics and Gynaecology, University of Tartu, Puusepa St. 8, Tartu 51014, Estonia

<sup>3</sup>Women's Clinic of Tartu University Hospital, Puusepa St. 8, Tartu 51014, Estonia

<sup>4</sup>The Institute for Molecular Medicine Finland (FIMM), Tukholmankatu 8, Helsinki FI-00014, Finland

\*co-corresponding authors: [siims@ut.ee](mailto:siims@ut.ee), [maris.laan@ut.ee](mailto:maris.laan@ut.ee)

**List of Supplementary Material:**

**Supplementary Methods.**

**Supplementary Figure S1.** RNA-Seq metrics for the 40 analyzed placental tissue samples.

**Supplementary Figure S2.** *Xist* gene expression shown as normalized read count in the placental samples subjected to RNA-Seq.

**Supplementary Figure S3.** Expression profiles for the genes positioning among the top-20 most highly expressed placental protein-coding genes in a specific pregnancy complication(s), but not in normal pregnancy.

**Supplementary Figure S4.** Venn diagram for the shared genes among the top 200 highest ranked genes in differential expression testing in pregnancy complications with Preeclampsia group divided according to the presence of IUGR.

**Supplementary Table S1.** Numbers of genes identified as differentially expressed in pregnancy complications based on the RNA-Seq dataset.

**Supplementary Table S2.** Enriched functional categories among differentially expressed genes in preeclampsia.

**Supplementary Table S3.** Differential placental gene expression analysis by Taqman RT-qPCR in complicated compared to normal pregnancies (n=24/group).

**Supplementary Table S4.** Genes with an opposite direction of the placental gene expression fold change in the two groups of small-for-gestational-age (SGA) and large-for-gestational-age (LGA) newborns compared to normal pregnancy.

**Supplementary Table S5.** TaqMan probe sets used in RT-qPCR experiments.

**Supplementary Data S1.** Top 200 transcripts and protein genes with the highest measured gene expression in FPKM in the studied pregnancy outcomes (a separate .xls file).

**Supplementary Data S2.** Genes reaching statistical significance (FDR<0.1) in differential expression analysis of potential confounding variables implemented in DESeq (a separate .xls file).

**Supplementary Data S3.** Top 300 differential expression test results in DESeq and DESeq2 for normal pregnancy placental samples compared to PE, GD, SGA, LGA study groups, and compared to PE without IUGR and PE with IUGR subgroups. (a separate .xls file).

**Supplementary Data S4.** Functional profiling of upregulated (n=42) and downregulated (n=173) genes in preeclamptic placentas (a separate .xls file).

**Supplementary Methods.**

**Library preparation, RNA-Seq and basic bioinformatics of raw data:** Preparation of RNA-Seq sequencing libraries, sequencing of transcriptomes and basic bioinformatic processing of the raw sequencing data (quality control, read alignment and transcript and gene expression estimation) were performed at the Sequencing Core facility of Finnish institute of Molecular Medicine (FIMM), University of Helsinki, Finland. High quality DNA-free total RNA (5 µg) was used for depletion of ribosomal RNA (Ribo-Zero™ rRNA Removal Kit, Epicentre, Madison, WI, USA). The rRNA depleted RNA was purified (NucleoSpin® RNA Clean-up XS, Macherey-Nagel, Duren, Germany) and reverse transcribed to ds cDNA (SuperScript™ Double-Stranded cDNA Synthesis Kit, Life Technologies, Carlsbad, CA, USA). Random hexamers (New England BioLabs, Ipswich, MA, USA) were used for priming the first strand synthesis reaction and SPRI beads (Agencourt AMPure XP, Beckman Coulter, Brea, CA, USA) for purification of cDNA.

Nextera™ Technology (Illumina, San Diego, CA, USA) was used for preparation of RNA-Seq Libraries. In order to add the Illumina specific bridgePCR compatible sites as well as bar codes and enrich the library, limited-cycle PCR (5 cycles) was done according to instructions of Nextera system. SPRI beads were used for purification of the PCR-products and the library QC was evaluated by Agilent Bioanalyzer (Agilent Technologies, Santa Clara, CA, USA). C-Bot (TruSeq PE Cluster Kit v3, Illumina, San Diego, CA, USA) was used for cluster generation and Illumina HiSeq2000 platform (HiSeq TruSeq v3 reagent kit) for paired end sequencing with 2 x 46 bp read length. Each transcriptome library was loaded to occupy 1/3 of the lane capacity in a flow cell. Two samples (1 x PE; 1 x LGA) were sequenced separately at ½ lane capacity and 2 x 101 bp read length.

Initial data analysis and preparation was conducted by the RNA-Seq pipeline v2.4 (FIMM) consisting of FastQC version 0.10.0 (S. Andrews. FastQC (2011) <<http://www.bioinformatics.babraham.ac.uk/projects/fastqc/>> Date of access: 29/06/2015) for quality control; reads were filtered for adaptor, rRNA and mtDNA sequences as well as homopolymer stretches using custom python scripts; read alignment was performed with TopHat version 2.0.3<sup>1</sup> using bowtie version 0.12.7<sup>2</sup>; transcript quantification was conducted with cufflinks v 2.0.2<sup>3</sup> with reference annotation (measured as FPKM) and gene expression was quantified by htseq-count<sup>4</sup> (as raw read counts). Human genome assembly (GRCh37.p7/hg19) from Ensembl v67 was used as a reference. Read alignment to genomic regions was estimated with Picard v1.63 (<http://picard.sourceforge.net>).

**Statistical analysis:** Differential expression in RNA-Seq data was tested using DESeq<sup>5</sup> and DESeq2<sup>6</sup> packages for R<sup>7</sup>. Read counts from htseq-count were used as input (number of Ensembl v67 genes with read counts  $n = 53893$ ). Genes with mean normalized expression  $< 50$  reads in all samples ( $n = 39425$  DESeq;  $n = 39345$  DESeq2) were considered as a transcriptional noise and filtered out from the analysis. After the exclusion of genes with negligible placental transcript counts, 14468 and 14548 genes entered differential expression testing implemented in DESeq and DESeq2 packages, respectively. Built-in normalization algorithms of DESeq and DESeq2 were used. Outlier detection and handling was performed using the default method in DESeq. In DESeq2 outliers were replaced using the *replaceOutliersWithTrimmedMean* function with default Cook's distance cutoff. Statistical testing indicated that the two software packages, DESeq and DESeq2 differ substantially for their sensitivity and robustness in assessment of differential expression. Compared to the seminal DESeq package, analysis with the more recently

developed DESeq2 programme produced a markedly higher number of significant results for all conducted differential expression tests with our data (**Supplementary Table S1**). Thus, in the current study a more stringent level of significance was imposed on the test results of DESeq2. A gene was considered as differentially expressed, when the statistical tests simultaneously satisfied the following empirically set thresholds: FDR<0.1 for DESeq and FDR<0.05 for DESeq2. No covariates were automatically included in the tested models. Instead, potential confounders (delivery mode, initiated labor activity, gestational age, gender, placental weight, birth weight/height, maternal pre-pregnancy BMI, weight gain, age and parity) were tested independently for the differential expression effect on all genes included into the analysis. For quantitative variables the samples were divided at the median value of the parameter. As the tested parameters confounded the expression level of a limited number of genes (**Supplementary Data S2**), no covariates were included into differential expression testing across whole-transcriptome in pregnancy complications.

Gene set enrichment analysis of identified genes with significant differential expression was performed using g:Profiler<sup>8</sup>. Enrichment was tested for categories related to Gene Ontology, KEGG pathways and transcription factor (TF) regulatory motifs. Statistical testing, principal component analysis (PCA) and hierarchical clustering (Pearson correlation as the distance function) was performed in R. To achieve a scaled expression value (Z-score), the gene expression levels were subjected to variance stabilizing transformation in DESeq and standardized by subtracting the mean expression across all samples from its value for a given sample and then dividing by the standard deviation across all the samples. Data on the enrichment of gene expression in the placenta compared to other tissues was derived from the publicly available Protein Atlas v12 database reporting RNA-Seq analysis across 27 human

tissues<sup>9</sup>.

The statistical analyses for RT-qPCR results were performed using statistical package STATA version 13.1. Significance of RT-qPCR measurements among the study groups was assessed by Wilcoxon test (no adjustment for covariates). For the genes estimated to be affected by confounding factors based on RNA-Seq data, logistic regression model was applied incorporating placental weight (*LEP*, *TET3*) and gestational age (*LEP*) as covariates. FDR was calculated according to Benjamini and Hochberg<sup>10</sup>.

### **Taqman RT-qPCR**

For an independent experimental validation, gene expression of 48 protein-encoding genes and a non-coding transcript *ITPK1-AS* (belonging to sense-antisense pair with *ITPK1*) was analyzed using Taqman RT-qPCR gene expression assays (Applied Biosystems, Life Technologies; **Supplementary Table S5**). Majority of the assessed genes (n=43) were selected from the top-list of differential expression in PE and two genes (*STS*, *FAM65B*) due to significantly altered expression in GD compared to NORM (DESeq: FDR<0.1 and DESeq2: FDR<0.05; **Supplementary Data S3**). Genes with unavailable pre-designed Taqman assay or low placental expression (< 100 normalized read count) were not subjected to validation. As no genes from the analysis of LGA vs NORM and SGA vs NORM satisfied the criteria to be selected to Taqman RT-qPCR validation, alternative differential expression tests among the study groups were performed (data not shown). Three additional genes showing trend for altered expression were taken forward to Taqman RT-qPCR: *SLC16A3* (GD vs LGA) and *MYO7B*, *TET3* (SGA vs LGA samples). All genes analyzed for the differential placental expression in PE (n=45) were also assessed in SGA samples; all genes tested in GD placentas (n=5) were also analyzed in the LGA

group (**Supplementary Table S5**).

Gene expression was quantitated by singleplex RT-qPCR of the target gene sequence using pre-made TaqMan Gene Expression Assays (Applied Biosystems, Life Technologies, **Supplementary Table S5**). In all experiments, a housekeeping gene *Ubiquitin C (UBC)* was applied as an endogenous control. The generated RNA-Seq dataset revealed *UBC* as one of the most stably expressed housekeeping genes in the human placenta, affected neither by gestational complications nor confounding variables of the mother, fetus, pregnancy and delivery (data not shown).

cDNA was synthesized from 1 µg total RNA according to the manufacturer's instructions (SuperScript III Reverse Transcriptase, Invitrogen, Life Technologies). All qPCR reactions were performed in triplicate in 384 micro-well plates in ABI 7900HT Real-time PCR system (Applied Biosystems, Life Technologies) using HOT FIREPol® Probe qPCR Mix (Solis BioDyne, Tartu, Estonia) and TaqMan Gene Expression Assays. Negative controls lacked template inputs. RT-qPCR reactions were initially denatured at 95°C for 15 min, followed by 40 cycles of 15 s at 95°C and 1 min at 60°C. Amplification efficiency of TaqMan assays was 90-110%.

Relative mRNA expression values were determined by comparative C<sub>T</sub> method as described previously (Applied Biosystems, Life Technologies)<sup>11,12</sup>.

## References.

1. Kim, D. *et al.* TopHat2: accurate alignment of transcriptomes in the presence of insertions, deletions and gene fusions. *Genome Biol.* **14**, R36 (2013).
2. Langmead, B., Trapnell, C., Pop, M. & Salzberg, S. L. Ultrafast and memory-efficient alignment of short DNA sequences to the human genome. *Genome Biol* **10**, R25 (2009).



3. Trapnell, C. *et al.* Transcript assembly and quantification by RNA-Seq reveals unannotated transcripts and isoform switching during cell differentiation. *Nat. Biotechnol.* **28**, 511–515 (2010).
4. Anders, S., Pyl, P. T. & Huber, W. *HTSeq A Python framework to work with high-throughput sequencing data.* *bioRxiv* (2014). doi:10.1101/002824
5. Anders, S. & Huber, W. Differential expression analysis for sequence count data. *Genome Biol* **11**, R106 (2010).
6. Love, M. I., Huber, W. & Anders, S. Moderated estimation of fold change and dispersion for RNA-seq data with DESeq2. *Genome Biol.* **15**, 550 (2014).
7. R Core Team. R: A Language and Environment for Statistical Computing. (2014). at <<http://www.r-project.org>> Date of access: 29/06/2015.
8. Reimand, J., Kull, M., Peterson, H., Hansen, J. & Vilo, J. G:Profiler-a web-based toolset for functional profiling of gene lists from large-scale experiments. *Nucleic Acids Res.* **35**, (2007).
9. Uhlen, M. *et al.* Towards a knowledge-based Human Protein Atlas. *Nat. Biotechnol.* **28**, 1248–1250 (2010).
10. Benjamini, Y. & Hochberg, Y. Controlling the False Discovery Rate: A Practical and Powerful Approach to Multiple Testing. *J. R. Stat. Soc. Ser. B* **57**, 289 – 300 (1995).
11. Uusküla, L. *et al.* Mid-Gestational Gene Expression Profile in Placenta and Link to Pregnancy Complications. *PLoS One* **7**, (2012).
12. Rull, K. *et al.* Increased placental expression and maternal serum levels of apoptosis-inducing TRAIL in recurrent miscarriage. *Placenta* **34**, 141–148 (2013).

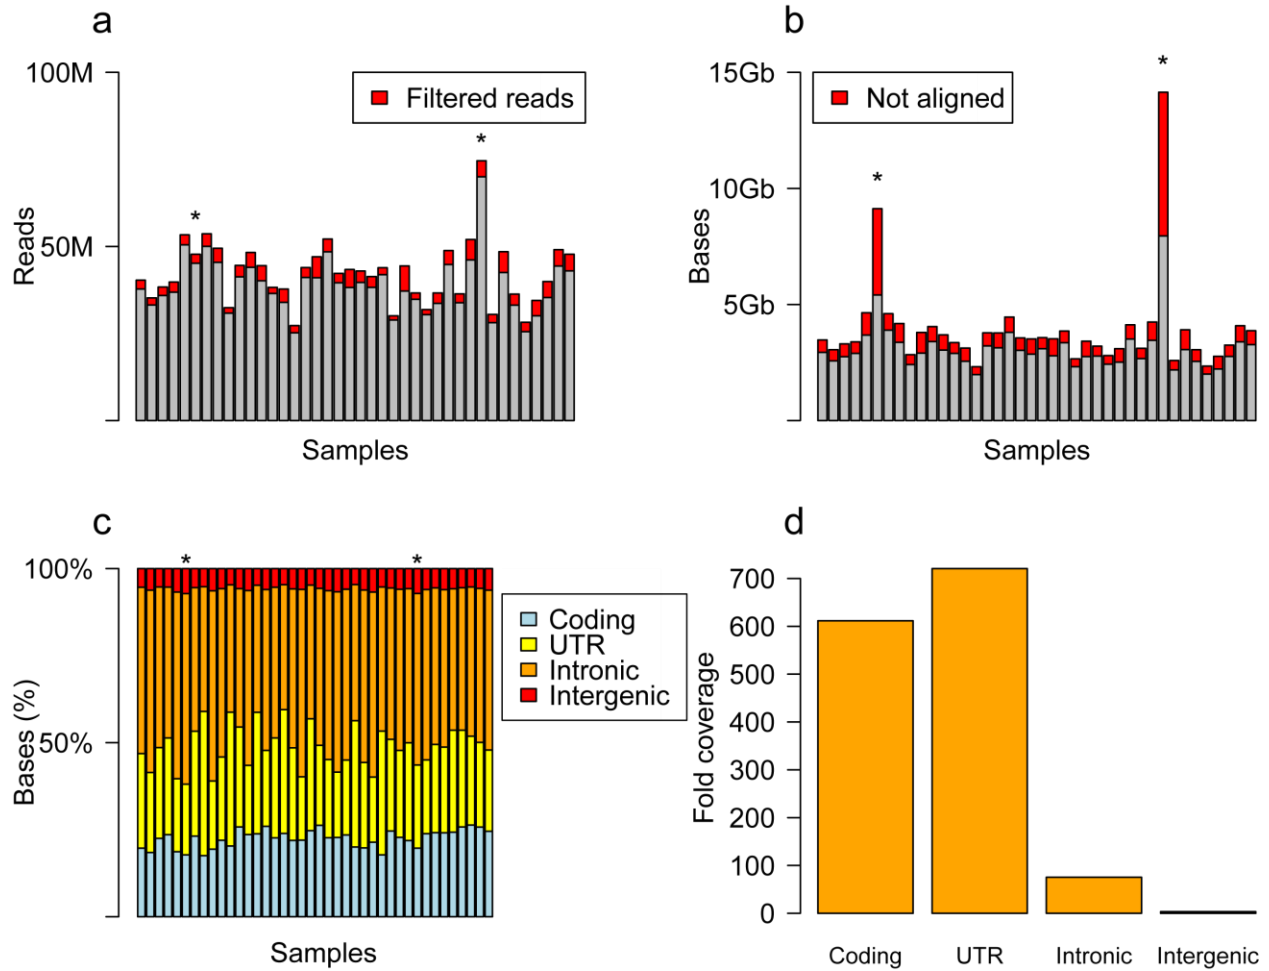

**Supplementary Figure S1. RNA-Seq metrics for the 40 analyzed placental tissue samples.** Majority (n=38) were subjected to 50-bp paired-end sequencing (Illumina HiSeq 2000), two samples were sequenced for 100+100 bp (indicated with \*). **(a)** Total count of read pairs; excluded reads for not matching the filtering criteria are highlighted in red, representing rRNA, mtDNA or adaptor sequences and sequences containing homopolymer stretches. **(b)** Alignment efficiency; the bars represent the total length of all filtered reads per sample (in Gb) and the sequence fraction unmapped to the human genome reference (Ensembl v67; GRCh37.p7) is shown in red. **(c)** Proportions of aligned bases mapping to the functional genomic domains. **(d)** Sequence coverage of the functional genomic domains estimated for the full dataset across samples; expressed as the mean coverage per bp. *Coding*, protein coding; *UTR*, untranslated regions; *intronic*, introns of multi-exon genes; *intergenic*, regions not annotated as genes.

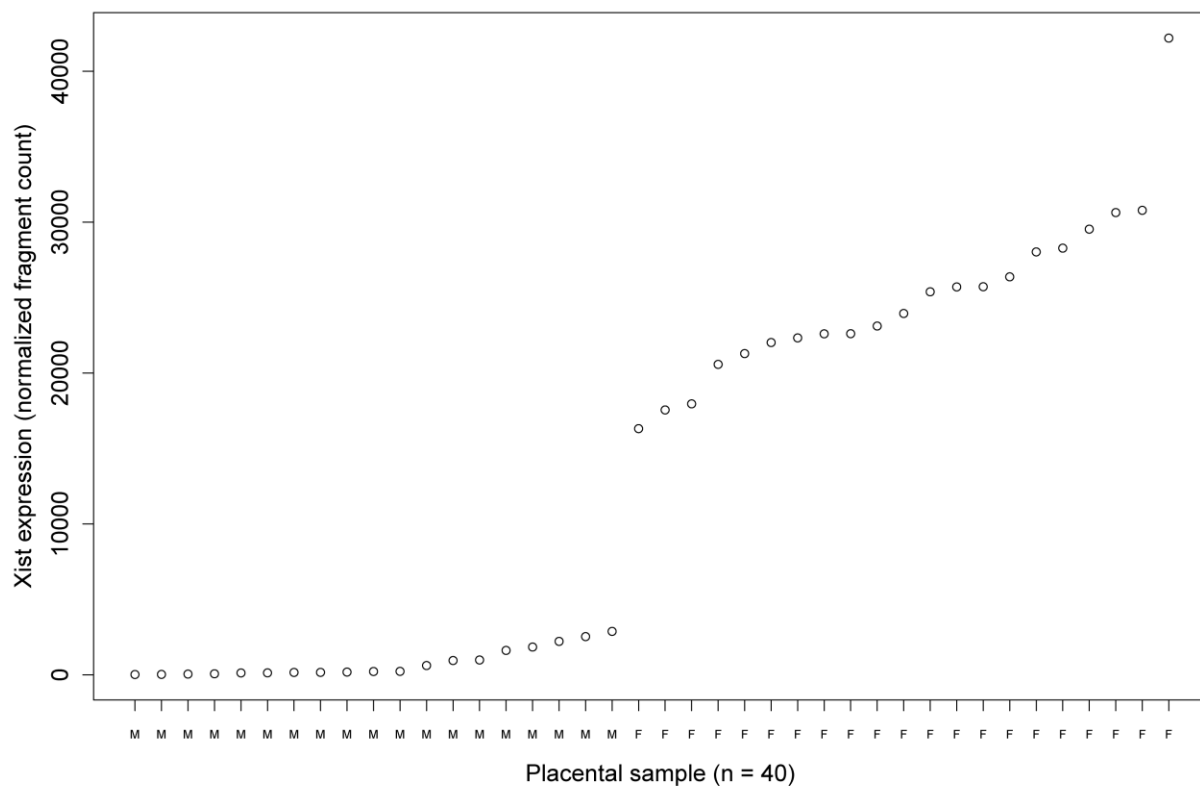

**Supplementary Figure S2. *Xist* gene expression shown as normalized read count in the placental samples subjected to RNA-Seq. Samples (XY, n=19; XX, n=21) have been ordered by the level of gene expression.**

F, female; M, male newborn; *Xist*, X-inactive specific transcript.

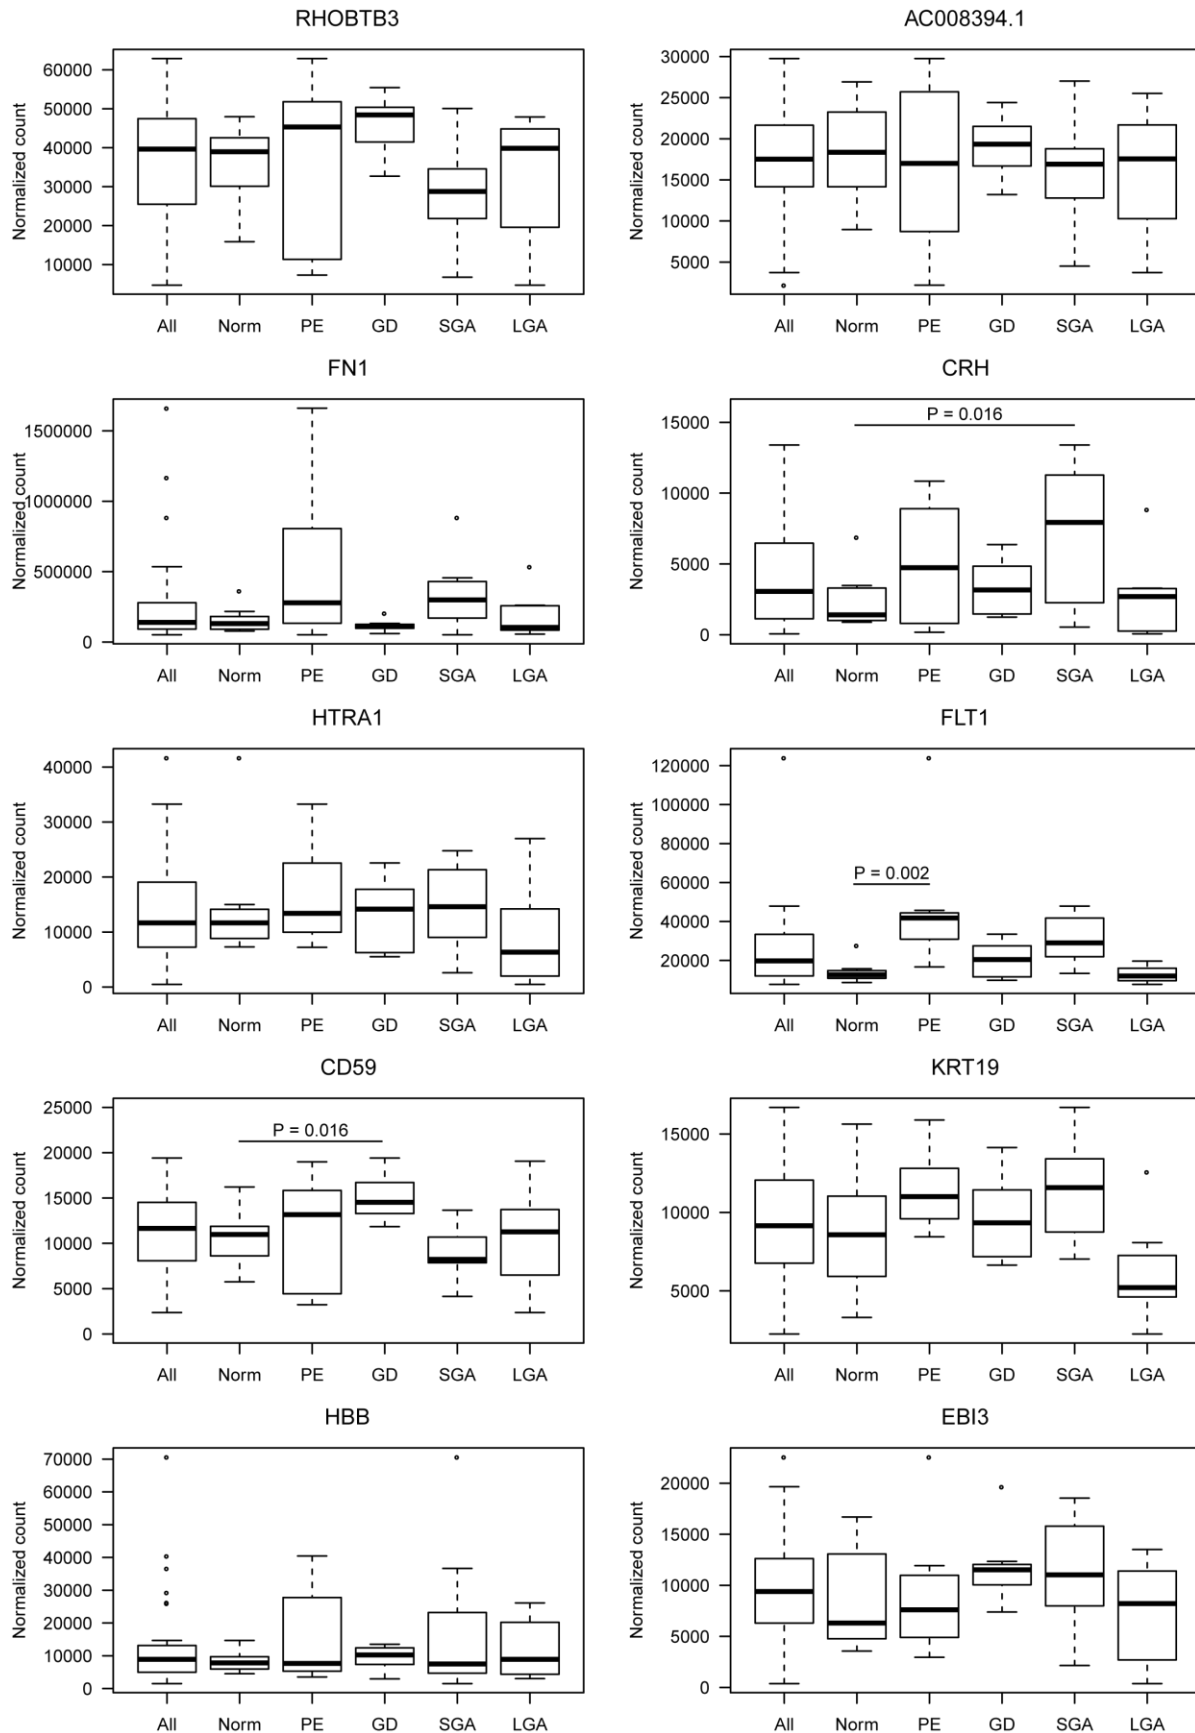

**Supplementary Figure S3. Expression profiles for the genes positioning among the top-20 most highly expressed placental protein-coding genes in a specific pregnancy complication(s), but not in normal pregnancy** (details in **Fig. 1**). Boxplots are based on the RNA-Seq data (normalized read counts) across all studied samples representing normal pregnancies (NORM) and adverse pregnancy outcomes (n=8/group).

GD, gestational diabetes; LGA, large-for-gestational-age newborns; SGA, small-for-gestational-age newborns; PE, preeclampsia; *AC008394.1*, annotated protein-coding transcript ENST00000445770.2; *CD59*, complement regulatory protein CD59; *CRH*, corticotropin releasing hormone; *EBI3*, Epstein-Barr virus induced 3; *FLT1*, fms-related tyrosine kinase 1, *FNI*, fibronectin 1; *HBB*, hemoglobin, beta; *HTRA1*, HtrA serine peptidase 1; *KRT19*, keratin 19; *RHOBTB3*, Rho-related BTB domain containing 3. *P*-values are from DESeq differential expression analysis.

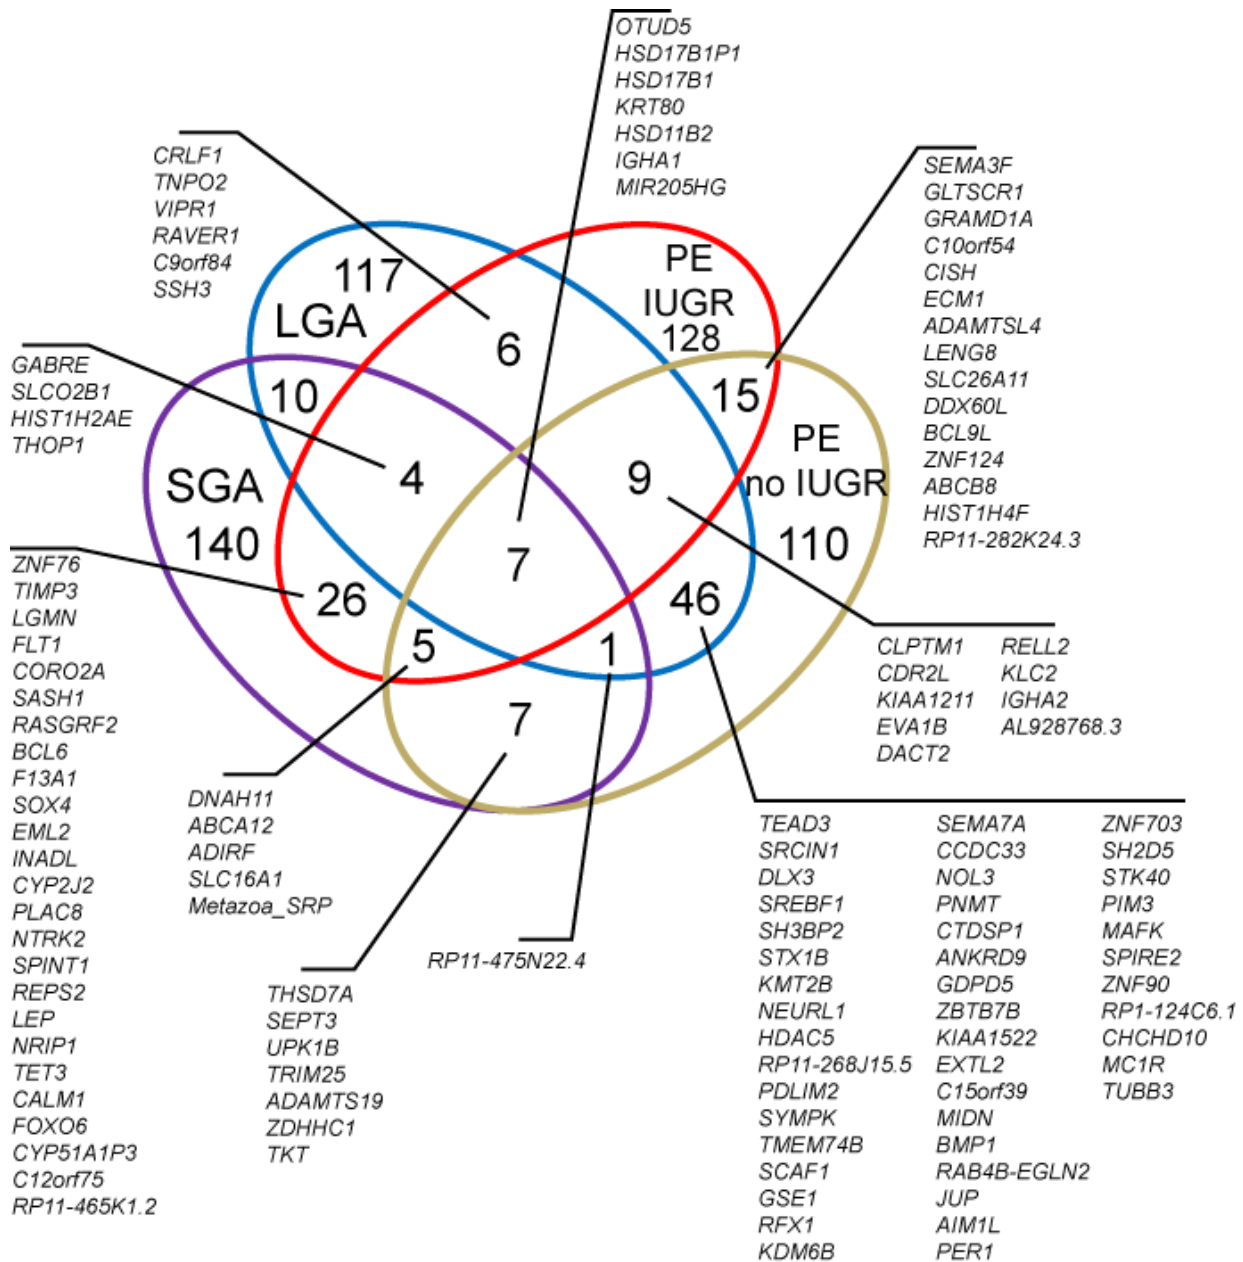

**Supplementary Figure S4.** Venn diagram for the shared genes among the top 200 highest ranked genes in differential expression testing in pregnancy complications with Preeclampsia group divided according to the presence of IUGR. The number and gene list in each intersection are given.

PE, preeclampsia, GD, gestational diabetes, SGA and LGA, small- and large-for-gestational-age newborns, IUGR – intrauterine growth restriction.

**Supplementary Table S1.** Numbers of genes identified as differentially expressed in pregnancy complications based on the RNA-Seq dataset.

| <b>Group<sup>a</sup></b> | <b>FDR = 0.1</b> |               |                | <b>FDR = 0.05</b> |               |                | <b>Matching differential expression criteria<sup>b</sup></b> |
|--------------------------|------------------|---------------|----------------|-------------------|---------------|----------------|--------------------------------------------------------------|
|                          | <b>DESeq</b>     | <b>DESeq2</b> | <b>Overlap</b> | <b>DESeq</b>      | <b>DESeq2</b> | <b>Overlap</b> |                                                              |
| <b>PE</b>                | 225              | 3485          | 220            | 125               | 2462          | 123            | 215                                                          |
| <b>GD</b>                | 9                | 372           | 4              | 2                 | 108           | 0              | 4                                                            |
| <b>SGA</b>               | 3                | 58            | 2              | 3                 | 26            | 2              | 2                                                            |
| <b>LGA</b>               | 5                | 49            | 1              | 5                 | 15            | 1              | 1                                                            |

<sup>a</sup> Differential expression was addressed using 8 case and 8 control (normal term) placental samples

<sup>b</sup> Genes were considered as differentially expressed if DESeq: FDR<0.1 and DESeq2: FDR<0.05  
GD, gestational diabetes; LGA, pregnancies with large-for-gestational-age newborns; PE, preeclampsia; SGA, pregnancies with small-for-gestational-age newborns

**Supplementary Table S2.** Enriched functional categories among differentially expressed genes in preeclampsia.

| Category                                       | Term ID     | DNA binding motif | Gene enrichment <sup>b</sup> |      |                       |
|------------------------------------------------|-------------|-------------------|------------------------------|------|-----------------------|
|                                                |             |                   | n                            | %    | P value               |
| <b>Upregulated genes (n=42<sup>a</sup>)</b>    |             |                   |                              |      |                       |
| Polyol biosynthetic process                    | GO:0046173  | NA                | 3                            | 8.60 | 3.04×10 <sup>-2</sup> |
| <b>Downregulated genes (n=173<sup>a</sup>)</b> |             |                   |                              |      |                       |
| Extracellular matrix                           | GO:0031012  | NA                | 14                           | 8.40 | 1.76×10 <sup>-3</sup> |
| Proteinaceous extracellular matrix             | GO:0005578  | NA                | 13                           | 7.80 | 2.46×10 <sup>-3</sup> |
| TF: AP2                                        | TF:M00800_4 | GSCCSCRGGCNRNRNN  | 115                          | 69.3 | 8.14×10 <sup>-9</sup> |
|                                                | TF:M00189_4 | MKCCCSCNGGCG      | 78                           | 47   | 7.88×10 <sup>-4</sup> |
|                                                | TF:M00915_4 | SNNNCCNCAGGCN     | 96                           | 57.8 | 3.55×10 <sup>-7</sup> |
| TF: AP2alpha                                   | TF:M00469_4 | GCCNNNRGS         | 41                           | 24.7 | 1.95×10 <sup>-4</sup> |
| TF: AP2gamma                                   | TF:M00470_4 | GCCYNNNGGS        | 43                           | 25.9 | 1.18×10 <sup>-3</sup> |
| TF: Egr                                        | TF:M00807_4 | GTGGGSGCRRS       | 46                           | 27.7 | 2.21×10 <sup>-2</sup> |
| TF: ETF                                        | TF:M00695_0 | GVGGMG            | 68                           | 41   | 3.58×10 <sup>-2</sup> |
| TF: LRF                                        | TF:M01100_4 | VNNRMCCCC         | 140                          | 84.3 | 5.96×10 <sup>-9</sup> |
| TF: MAZ                                        | TF:M00649_0 | GGGGAGGG          | 66                           | 39.8 | 3.30×10 <sup>-2</sup> |
| TF: Sp1                                        | TF:M00933_4 | CCCCGCCCCN        | 94                           | 56.6 | 8.23×10 <sup>-6</sup> |
|                                                | TF:M00931_4 | GGGGCGGGGC        | 90                           | 54.2 | 4.33×10 <sup>-5</sup> |
|                                                | TF:M00008_4 | GGGGCGGGGT        | 109                          | 65.7 | 1.91×10 <sup>-5</sup> |
|                                                | TF:M00196_4 | GGGGAGGG          | 95                           | 57.2 | 1.92×10 <sup>-6</sup> |
| TF: VDR                                        | TF:M00444_4 | GGGKNARNRRGGWSA   | 125                          | 75.3 | 2.80×10 <sup>-3</sup> |

<sup>a</sup> Genes matching study criteria for significant differential expression (DESeq: FDR<0.1 and DESeq2: FDR < 0.05).

<sup>b</sup> Statistical analysis of gene enrichment in functional categories was implemented in gProfiler<sup>10</sup>. n, number of genes in the specific pathway within the tested gene list; %, fraction of analyzed genes in the pathway



**Supplementary Table S3.** Differential placental gene expression analysis by Taqman RT-qPCR in complicated compared to normal pregnancies (n=24/group).

| Gene      | PE (N=24) |                                 |                      |                  | SGA (N=24) |                                 |                      |                  |
|-----------|-----------|---------------------------------|----------------------|------------------|------------|---------------------------------|----------------------|------------------|
|           | FC        | Concordant effects <sup>a</sup> | P value <sup>b</sup> | FDR <sup>c</sup> | FC         | Concordant effects <sup>a</sup> | P value <sup>b</sup> | FDR <sup>c</sup> |
| TMEM74B   | 0.473     | +                               | 1.00E-04             | 0.002            | 0.526      | +                               | 0.002                | 0.045            |
| FLT1      | 2.578     | +                               | 1.00E-04             | 0.002            | 1.799      | +                               | 0.002                | 0.045            |
| CDR2L     | 0.687     | +                               | 5.00E-04             | 0.005            | 0.707      | +                               | 0.003                | 0.045            |
| IGHA1     | 0.512     | +                               | 3.00E-04             | 0.005            | 0.689      | +                               | 0.020                | 0.162            |
| LEP       | 10.017    | +                               | 3.60E-04             | 0.003            | 3.081      | +                               | 0.009                | 0.085            |
| HSD17B1   | 0.505     | +                               | 4.00E-04             | 0.005            | 0.739      | +                               | 0.126                | 0.421            |
| MC1R      | 0.547     | +                               | 8.00E-04             | 0.006            | 0.771      | +                               | 0.242                | 0.494            |
| DOT1L     | 0.667     | +                               | 1.50E-03             | 0.010            | 0.844      | +                               | 0.360                | 0.627            |
| STX1B     | 0.580     | +                               | 0.004                | 0.021            | 0.911      | +                               | 0.718                | 0.900            |
| GRAMD1A   | 0.581     | +                               | 0.009                | 0.040            | 0.695      | +                               | 0.217                | 0.494            |
| ITPK1-AS1 | 0.696     | +                               | 0.009                | 0.040            | 0.790      | +                               | 0.120                | 0.421            |
| ZNF469    | 0.652     | +                               | 0.009                | 0.040            | 0.737      | +                               | 0.475                | 0.770            |
| SLC25A35  | 0.664     | +                               | 0.014                | 0.051            | 0.694      | +                               | 0.024                | 0.162            |
| DLX4      | 0.662     | +                               | 0.013                | 0.051            | 0.738      | +                               | 0.071                | 0.301            |
| GDPD5     | 0.647     | +                               | 0.019                | 0.056            | 0.651      | +                               | 0.050                | 0.262            |
| TMEM8A    | 0.758     | +                               | 0.018                | 0.056            | 0.806      | +                               | 0.101                | 0.397            |
| ITPK1     | 0.707     | +                               | 0.019                | 0.056            | 0.784      | +                               | 0.191                | 0.473            |
| ADM       | 0.697     | +                               | 0.026                | 0.072            | 0.697      | +                               | 0.159                | 0.461            |
| OTUD5     | 0.838     | +                               | 0.030                | 0.079            | 0.917      | +                               | 0.734                | 0.900            |
| TET3      | 1.539     | +                               | 0.039                | 0.096            | 1.662      | +                               | 0.006                | 0.071            |
| RELL2     | 0.529     | +                               | 0.041                | 0.097            | 0.643      | +                               | 0.242                | 0.494            |
| HSD11B2   | 0.696     | +                               | 0.050                | 0.112            | 0.731      | +                               | 0.167                | 0.461            |
| KIAA1211  | 0.638     | +                               | 0.070                | 0.142            | 1.135      | -                               | 0.496                | 0.777            |
| RFX1      | 0.724     | +                               | 0.073                | 0.143            | 0.867      | +                               | 0.915                | 0.935            |
| SH3PXD2A  | 1.580     | +                               | 0.080                | 0.150            | 1.428      | +                               | 0.024                | 0.162            |
| DLX3      | 0.806     | +                               | 0.101                | 0.176            | 0.869      | +                               | 0.360                | 0.627            |
| SLC26A11  | 0.834     | +                               | 0.112                | 0.189            | 0.920      | +                               | 0.915                | 0.935            |
| KLC2      | 0.817     | +                               | 0.138                | 0.223            | 0.814      | +                               | 0.148                | 0.461            |
| ABCA12    | 1.492     | +                               | 0.149                | 0.233            | 1.133      | +                               | 0.187                | 0.473            |
| ECM1      | 0.809     | +                               | 0.209                | 0.316            | 0.880      | +                               | 0.882                | 0.935            |
| AQPEP     | 1.589     | +                               | 0.275                | 0.403            | 0.907      | -                               | 0.395                | 0.662            |
| SPINT1    | 0.865     | +                               | 0.312                | 0.445            | 2.310      | -                               | 0.832                | 0.930            |
| LTBP3     | 0.969     | +                               | 0.343                | 0.474            | 0.912      | +                               | 0.766                | 0.900            |
| BCL6      | 1.196     | +                               | 0.496                | 0.614            | 1.308      | +                               | 0.071                | 0.301            |
| TEAD3     | 1.058     | -                               | 0.496                | 0.614            | 1.054      | -                               | 0.307                | 0.601            |
| TMPRSS6   | 0.898     | +                               | 0.496                | 0.614            | 0.927      | -                               | 0.352                | 0.627            |
| CSF3R     | 0.831     | +                               | 0.471                | 0.614            | 0.970      | +                               | 0.860                | 0.935            |

|                    |           |                                       |                            |                        |                     |                                       |                            |                        |
|--------------------|-----------|---------------------------------------|----------------------------|------------------------|---------------------|---------------------------------------|----------------------------|------------------------|
| DACT2              | 0.885     | +                                     | 0.509                      | 0.614                  | 0.857               | +                                     | 0.580                      | 0.802                  |
| MYO7B              | 1.210     | +                                     | 0.523                      | 0.614                  | 0.869               | -                                     | 0.655                      | 0.879                  |
| SRCIN1             | 0.842     | +                                     | 0.550                      | 0.630                  | 1.028               | -                                     | 0.766                      | 0.900                  |
| C10orf54           | 0.895     | +                                     | 0.695                      | 0.778                  | 0.847               | +                                     | 0.551                      | 0.785                  |
| ADAMTSL4           | 1.070     | -                                     | 0.742                      | 0.810                  | 1.062               | -                                     | 0.551                      | 0.785                  |
| SEMA3F             | 1.043     | -                                     | 0.902                      | 0.921                  | 1.060               | -                                     | 0.551                      | 0.785                  |
| IPMK               | 1.102     | +                                     | 0.902                      | 0.921                  | 1.034               | +                                     | 0.798                      | 0.915                  |
| DDX60L             | 1.048     | +                                     | 0.951                      | 0.951                  | 0.852               | -                                     | 0.225                      | 0.494                  |
| <b>GD (N = 24)</b> |           |                                       |                            |                        | <b>LGA (N = 24)</b> |                                       |                            |                        |
| <b>Gene</b>        | <b>FC</b> | <b>Concordant effects<sup>a</sup></b> | <b>P value<sup>b</sup></b> | <b>FDR<sup>c</sup></b> | <b>FC</b>           | <b>Concordant effects<sup>a</sup></b> | <b>P value<sup>b</sup></b> | <b>FDR<sup>c</sup></b> |
| LEP                | 1.406     | +                                     | 0.468                      | 0.585                  | 2.388               | -                                     | 0.643                      | 0.709                  |
| TET3               | 1.431     | +                                     | 0.282                      | 0.350                  | 1.936               | -                                     | 0.307                      | 0.520                  |
| SLC16A3            | 1.462     | +                                     | 0.013                      | 0.065                  | 1.090               | -                                     | 0.278                      | 0.520                  |
| STS                | 1.032     | +                                     | 0.757                      | 0.760                  | 0.902               | -                                     | 0.621                      | 0.670                  |
| FAM65B             | 1.300     | +                                     | 0.248                      | 0.350                  | 1.167               | -                                     | 0.665                      | 0.670                  |

FC - fold change; PE - preeclampsia, GD - gestational diabetes, SGA - small for gestational age, LGA - large for gestational age.

<sup>a</sup> - Concordant effect direction in normal group compared to complication group from RNA-Seq and RT-qPCR experiments

<sup>b</sup> - Wilcoxon test

<sup>c</sup> - FDR was calculated according to Benjamini and Hochberg

**Supplementary Table S4.** Genes with an opposite direction of the placental gene expression fold change in the two groups of small-for-gestational-age (SGA) and large-for-gestational-age (LGA) newborns compared to normal pregnancy.

| Ensembl ID      | Name          | Fold change<br>in SGA | Fold change<br>in LGA | Type           |
|-----------------|---------------|-----------------------|-----------------------|----------------|
| ENSG00000132613 | MTSS1L        | 1.570                 | 0.597                 | protein_coding |
| ENSG00000147872 | PLIN2         | 1.530                 | 0.504                 | protein_coding |
| ENSG00000169495 | HTRA4         | 2.382                 | 0.678                 | protein_coding |
| ENSG00000089847 | ANKRD24       | 1.550                 | 0.684                 | protein_coding |
| ENSG00000185112 | FAM43A        | 1.503                 | 0.705                 | protein_coding |
| ENSG00000183779 | ZNF703        | 1.404                 | 0.513                 | protein_coding |
| ENSG00000073060 | SCARB1        | 1.401                 | 0.708                 | protein_coding |
| ENSG00000172379 | ARNT2         | 1.872                 | 0.718                 | protein_coding |
| ENSG00000107518 | ATRNL1        | 0.590                 | 1.387                 | protein_coding |
| ENSG00000113916 | BCL6          | 1.714                 | 0.723                 | protein_coding |
| ENSG00000169994 | MYO7B         | 2.080                 | 0.741                 | protein_coding |
| ENSG00000107819 | SFXN3         | 1.341                 | 0.575                 | protein_coding |
| ENSG00000105137 | SYDE1         | 1.336                 | 0.562                 | protein_coding |
| ENSG00000241852 | C8orf58       | 1.721                 | 0.762                 | protein_coding |
| ENSG00000113946 | CLDN16        | 0.397                 | 1.311                 | protein_coding |
| ENSG00000116883 | RP11-268J15.5 | 1.311                 | 0.518                 | protein_coding |
| ENSG00000174697 | LEP           | 12.275                | 0.766                 | protein_coding |
| ENSG00000107957 | SH3PXD2A      | 1.784                 | 0.768                 | protein_coding |
| ENSG00000254087 | LYN           | 1.585                 | 0.786                 | protein_coding |
| ENSG00000090776 | EFNB1         | 1.269                 | 0.667                 | protein_coding |
| ENSG00000144791 | LIMD1         | 1.266                 | 0.676                 | protein_coding |
| ENSG00000171097 | CCBL1         | 1.693                 | 0.835                 | protein_coding |
| ENSG00000154262 | ABCA6         | 0.526                 | 1.195                 | protein_coding |
| ENSG00000107954 | NEURL1        | 1.183                 | 0.641                 | protein_coding |
| ENSG00000163286 | ALPPL2        | 1.176                 | 0.393                 | protein_coding |
| ENSG00000214193 | SH3D21        | 1.174                 | 0.588                 | protein_coding |
| ENSG00000166866 | MYO1A         | 0.356                 | 1.170                 | protein_coding |
| ENSG00000187605 | TET3          | 1.778                 | 0.855                 | protein_coding |
| ENSG00000113719 | ERGIC1        | 1.541                 | 0.857                 | protein_coding |
| ENSG00000139971 | C14orf37      | 1.813                 | 0.859                 | protein_coding |
| ENSG00000214357 | NEURL1B       | 2.055                 | 0.866                 | protein_coding |
| ENSG00000087266 | SH3BP2        | 1.153                 | 0.575                 | protein_coding |
| ENSG00000232986 | RP11-179A7.2  | 0.539                 | 1.149                 | lincRNA        |
| ENSG00000131037 | EPS8L1        | 1.142                 | 0.561                 | protein_coding |
| ENSG00000196975 | ANXA4         | 1.141                 | 0.708                 | protein_coding |

|                 |                 |       |       |                      |
|-----------------|-----------------|-------|-------|----------------------|
| ENSG00000162704 | ARPC5           | 0.668 | 1.139 | protein_coding       |
| ENSG00000125503 | PPP1R12C        | 1.128 | 0.676 | protein_coding       |
| ENSG00000120913 | PDLIM2          | 1.118 | 0.665 | protein_coding       |
| ENSG00000243156 | MICAL3          | 1.711 | 0.896 | protein_coding       |
| ENSG00000064687 | ABCA7           | 1.746 | 0.903 | protein_coding       |
| ENSG00000165323 | FAT3            | 0.904 | 1.947 | protein_coding       |
| ENSG00000093100 | XXbac-B461K10.4 | 2.241 | 0.907 | processed_transcript |
| ENSG00000166592 | RRAD            | 2.340 | 0.919 | protein_coding       |
| ENSG00000131149 | GSE1            | 1.084 | 0.663 | protein_coding       |
| ENSG00000140481 | CCDC33          | 1.078 | 0.538 | protein_coding       |
| ENSG00000178209 | PLEC            | 1.075 | 0.651 | protein_coding       |
| ENSG00000143036 | SLC44A3         | 1.768 | 0.931 | protein_coding       |
| ENSG00000162747 | FCGR3B          | 1.073 | 0.480 | protein_coding       |
| ENSG00000185842 | DNAH14          | 0.932 | 1.567 | protein_coding       |
| ENSG00000102755 | FLT1            | 2.242 | 0.932 | protein_coding       |
| ENSG00000141098 | GFOD2           | 1.063 | 0.685 | protein_coding       |
| ENSG00000162512 | SDC3            | 1.055 | 0.668 | protein_coding       |
| ENSG00000185215 | TNFAIP2         | 2.079 | 0.954 | protein_coding       |
| ENSG00000230490 | RP11-141M1.3    | 0.531 | 1.036 | lincRNA              |
| ENSG00000136235 | GPNMB           | 0.550 | 1.034 | protein_coding       |
| ENSG00000197121 | PGAP1           | 0.972 | 1.468 | protein_coding       |
| ENSG00000246859 | STARD4-AS1      | 0.975 | 1.486 | antisense            |
| ENSG00000152078 | TMEM56          | 0.976 | 1.744 | protein_coding       |
| ENSG00000235162 | C12orf75        | 2.205 | 0.976 | protein_coding       |
| ENSG00000144579 | CTDSP1          | 1.021 | 0.688 | protein_coding       |
| ENSG00000246090 | RP11-696N14.1   | 0.983 | 1.605 | antisense            |
| ENSG00000179094 | PER1            | 1.009 | 0.621 | protein_coding       |
| ENSG00000198668 | CALM1           | 1.486 | 0.992 | protein_coding       |
| ENSG00000072310 | SREBF1          | 1.003 | 0.660 | protein_coding       |
| ENSG00000106991 | ENG             | 1.874 | 0.997 | protein_coding       |

**Supplementary Table S5.** TaqMan probe sets used in RT-qPCR experiments.

| Genes analyzed by Taqman RT-qPCR |                                                     |                      | Analyzed clinical subgroups |    |     |    |     |
|----------------------------------|-----------------------------------------------------|----------------------|-----------------------------|----|-----|----|-----|
| Symbol                           | Gene Name                                           | Taqman Assay ID      | Norm                        | PE | SGA | GD | LGA |
| <b><i>UBC (reference)</i></b>    | <b>ubiquitin C</b>                                  | <b>Hs00824723_m1</b> | +                           | +  | +   | +  | +   |
|                                  | ATP-binding cassette; sub-family A member           |                      |                             |    |     |    |     |
| <i>ABCA12</i>                    | 12                                                  | Hs00292421_m1        | +                           | +  | +   |    |     |
| <i>ADAMTSL4</i>                  | ADAMTS-like 4                                       | Hs00417524_m1        | +                           | +  | +   |    |     |
| <i>ADM</i>                       | adrenomedullin                                      | Hs00969450_g1        | +                           | +  | +   |    |     |
| <i>AQPEP</i>                     | laeverin                                            | Hs01060572_m1        | +                           | +  | +   |    |     |
| <i>BCL6</i>                      | B-cell CLL/lymphoma 6                               | Hs00153368_m1        | +                           | +  | +   |    |     |
| <i>C10orf54</i>                  | chr 10 open reading frame 54                        | Hs00735289_m1        | +                           | +  | +   |    |     |
| <i>CDR2L</i>                     | cerebellar degeneration-related protein 2-like      | Hs00412746_m1        | +                           | +  | +   |    |     |
|                                  | colony stimulating factor 3 receptor                |                      |                             |    |     |    |     |
| <i>CSF3R</i>                     | (granulocyte)                                       | Hs00167918_m1        | +                           | +  | +   |    |     |
|                                  | dapper; antagonist of beta-catenin; homolog 2       |                      |                             |    |     |    |     |
| <i>DACT2</i>                     | ( <i>Xenopus laevis</i> )                           | Hs00915740_m1        | +                           | +  | +   |    |     |
|                                  | DEAD (Asp-Glu-Ala-Asp) box polypeptide              |                      |                             |    |     |    |     |
| <i>DDX60L</i>                    | 60-like                                             | Hs01016279_m1        | +                           | +  | +   |    |     |
| <i>DLX3</i>                      | distal-less homeobox 3                              | Hs00270938_m1        | +                           | +  | +   |    |     |
| <i>DLX4</i>                      | distal-less homeobox 4                              | Hs00231080_m1        | +                           | +  | +   |    |     |
|                                  | DOT1-like; histone H3 methyltransferase ( <i>S.</i> |                      |                             |    |     |    |     |
| <i>DOT1L</i>                     | <i>cerevisiae</i> )                                 | Hs01588547_m1        | +                           | +  | +   |    |     |
| <i>ECM1</i>                      | extracellular matrix protein 1                      | Hs00189435_m1        | +                           | +  | +   |    |     |
|                                  | family with sequence similarity 65; member          |                      |                             |    |     |    |     |
| <i>FAM65B</i>                    | B                                                   | Hs00210599_m1        | +                           |    |     | +  | +   |
|                                  | fms-related tyrosine kinase 1 (vascular             |                      |                             |    |     |    |     |
|                                  | endothelial growth factor/vascular                  |                      |                             |    |     |    |     |
| <i>FLT1</i>                      | permeability factor receptor)                       | Hs01052961_m1        | +                           | +  | +   |    |     |
|                                  | glycerophosphodiester phosphodiesterase             |                      |                             |    |     |    |     |
| <i>GDPD5</i>                     | domain containing 5                                 | Hs00229270_m1        | +                           | +  | +   |    |     |

|                            |                                                                                        |               |   |   |   |   |   |
|----------------------------|----------------------------------------------------------------------------------------|---------------|---|---|---|---|---|
| <i>GRAMD1A</i>             | GRAM domain containing 1A                                                              | Hs00385157_m1 | + | + | + |   |   |
| <i>HSD11B2<sup>a</sup></i> | hydroxysteroid (11-beta) dehydrogenase 2                                               | Hs00388669_m1 | + | + | + |   |   |
| <i>HSD11B2</i>             | hydroxysteroid (11-beta) dehydrogenase 2                                               | Hs00930759_g1 | + | + | + |   |   |
| <i>HSD17B1</i>             | hydroxysteroid (17-beta) dehydrogenase 1                                               | Hs00166219_g1 | + | + | + |   |   |
| <i>IGHA1</i>               | immunoglobulin heavy constant alpha 1                                                  | Hs00733892_m1 | + | + | + |   |   |
| <i>ITPK1</i>               | inositol-tetrakisphosphate 1-kinase                                                    | Hs00356546_m1 | + | + | + |   |   |
| <i>ITPK1-AS1</i>           | ITPK1 antisense RNA 1 (non-protein coding)                                             | Hs01053867_s1 | + | + | + |   |   |
| <i>KIAA1211</i>            | uncharacterized protein;KIAA1211                                                       | Hs00393402_m1 | + | + | + |   |   |
| <i>KLC2</i>                | kinesin light chain 2                                                                  | Hs00224491_m1 | + | + | + |   |   |
| <i>LEP</i>                 | leptin                                                                                 | Hs00174877_m1 | + | + | + | + | + |
| <i>LTBP3</i>               | latent transforming growth factor beta binding protein 3                               | Hs01105746_m1 | + | + | + |   |   |
| <i>MC1R</i>                | melanocortin 1 receptor (alpha melanocyte stimulating hormone receptor)                | Hs00267168_s1 | + | + | + |   |   |
| <i>MIR205HG</i>            | MIR205 host gene (non-protein coding)                                                  | Hs03405498_m1 | + | + | + |   |   |
| <i>MYO7B</i>               | myosin VIIB                                                                            | Hs00400099_m1 | + | + | + |   |   |
| <i>OTUD5</i>               | OTU domain containing 5                                                                | Hs00380113_m1 | + | + | + |   |   |
| <i>RELL2</i>               | RELT-like 2                                                                            | Hs00946747_g1 | + | + | + |   |   |
| <i>RFX1</i>                | regulatory factor X; 1 (influences HLA class II expression)                            | Hs00172561_m1 | + | + | + |   |   |
| <i>SEMA3F</i>              | sema domain; immunoglobulin domain (Ig); short basic domain; secreted; (semaphorin) 3F | Hs00188273_m1 | + | + | + |   |   |
| <i>SH3PXD2A</i>            | SH3 and PX domains 2A                                                                  | Hs00206037_m1 | + | + | + |   |   |
| <i>SLC16A3</i>             | solute carrier family 16; member 3 (monocarboxylic acid transporter 4)                 | Hs00358829_m1 | + |   |   | + | + |
| <i>SLC25A35</i>            | solute carrier family 25; member 35                                                    | Hs01390367_m1 | + | + | + |   |   |
| <i>SLC26A11</i>            | solute carrier family 26; member 11                                                    | Hs00543412_m1 | + | + | + |   |   |
| <i>SPINT1</i>              | serine peptidase inhibitor; Kunitz type 1                                              | Hs00173678_m1 | + | + | + |   |   |
| <i>SRCIN1</i>              | SRC kinase signaling inhibitor 1                                                       | Hs00382426_m1 | + | + | + |   |   |

|                |                                           |               |   |   |   |   |   |
|----------------|-------------------------------------------|---------------|---|---|---|---|---|
| <i>STS</i>     | steroid sulfatase (microsomal); isozyme S | Hs00996676_m1 | + |   |   | + | + |
| <i>STX1B</i>   | syntaxin 1B                               | Hs01041315_m1 | + | + | + |   |   |
| <i>TEAD3</i>   | TEA domain family member 3                | Hs00243231_m1 | + | + | + |   |   |
| <i>TET3</i>    | tet methylcytosine dioxygenase 3          | Hs00379125_m1 | + | + | + | + | + |
| <i>TMEM74B</i> | transmembrane protein 74B                 | Hs00217957_m1 | + | + | + |   |   |
| <i>TMEM8A</i>  | transmembrane protein 8A                  | Hs00430489_m1 | + | + | + |   |   |
| <i>TMPRSS6</i> | transmembrane protease; serine 6          | Hs00542184_m1 | + | + | + |   |   |

<sup>a</sup> two alternative probe set were used due to low efficiency of PCR amplification (<90%)

NORM, uncomplicated pregnancies resulting in the birth of newborn with normal birth weight; SGA, pregnancies resulted in the birth of baby born as small-for-gestational age, <10<sup>th</sup> centile; LGA, pregnancies resulted in the birth of baby born as large-for-gestational age, >10<sup>th</sup> centile; PE, pregnancies complicated with severe preeclampsia; GD, pregnancies complicated with gestational diabetes  
The weight centiles for defining SGA and LGA were calculated on the basis of data from Estonian Medical Birth Registry (Ref: Karro H, Rahu M, Gornoi K, Baburin A (1997) *Eesti Arst* (4):299-303 [in Estonian])
